# Supplementary material for: What is the maximum charge uptake of Lindqvist-type polyoxovanadates in organic–inorganic heterostructures?
Source: Royal Society of Chemistry journal article supplement (doi:10.1039/d2cp04687c), 2022-01-01
Supplement: d2cp04687c1.pdf [file d2cp04687c1.pdf]

## SUPPLEMENTARY INFORMATION

### **What is the maximum charge uptake of Lindqvist-type polyoxovanadates in organic-inorganic heterostructures?**

Anastasia S. Sorokina,<sup>a</sup> Dmitry A. Ryndyk,<sup>a,d</sup> Kirill Yu. Monakhov<sup>e</sup> and Thomas Heine<sup>\*a,b,c</sup>

<sup>a</sup> *Centre for Advancing Electronics Dresden and Faculty of Chemistry and Food Chemistry, TU Dresden, 01062 Dresden, Germany*

<sup>b</sup> *Helmholtz-Zentrum Dresden-Rossendorf, Institute of Resource Ecology, Leipzig Research Branch, 04316 Leipzig, Germany*

<sup>c</sup> *Department of Chemistry, Yonsei University, and ibs center for nanomedicine, Seodaemun-gu, Seoul 120-749, Republic of Korea*

<sup>d</sup> *Institute for Materials Science, TU Dresden, 01062 Dresden, Germany*

<sup>e</sup> *Leibniz Institute of Surface Engineering (IOM), Permoserstraße 15, 04318 Leipzig, Germany*

## I. Charge distribution in the POV6 *without* compensating counterions

The charge distribution during sequential addition of electrons to the dicationic POV6 core in the presence of  $2^+$  counterion (Mg) or two  $1^+$  counterions ( $\text{NH}_4$ ) is studied. To investigate the influence of ligand and cation type, various combinations of ligands and cations are considered for this simulation (Fig. S1): the system with type I ligands and Mg cation (Type\_I\_Mg), the system with type I ligands and two  $\text{NH}_4$  cations (Type\_I\_NH<sub>4</sub>) and the system with type III ligands and Mg cation (Type\_III\_Mg).

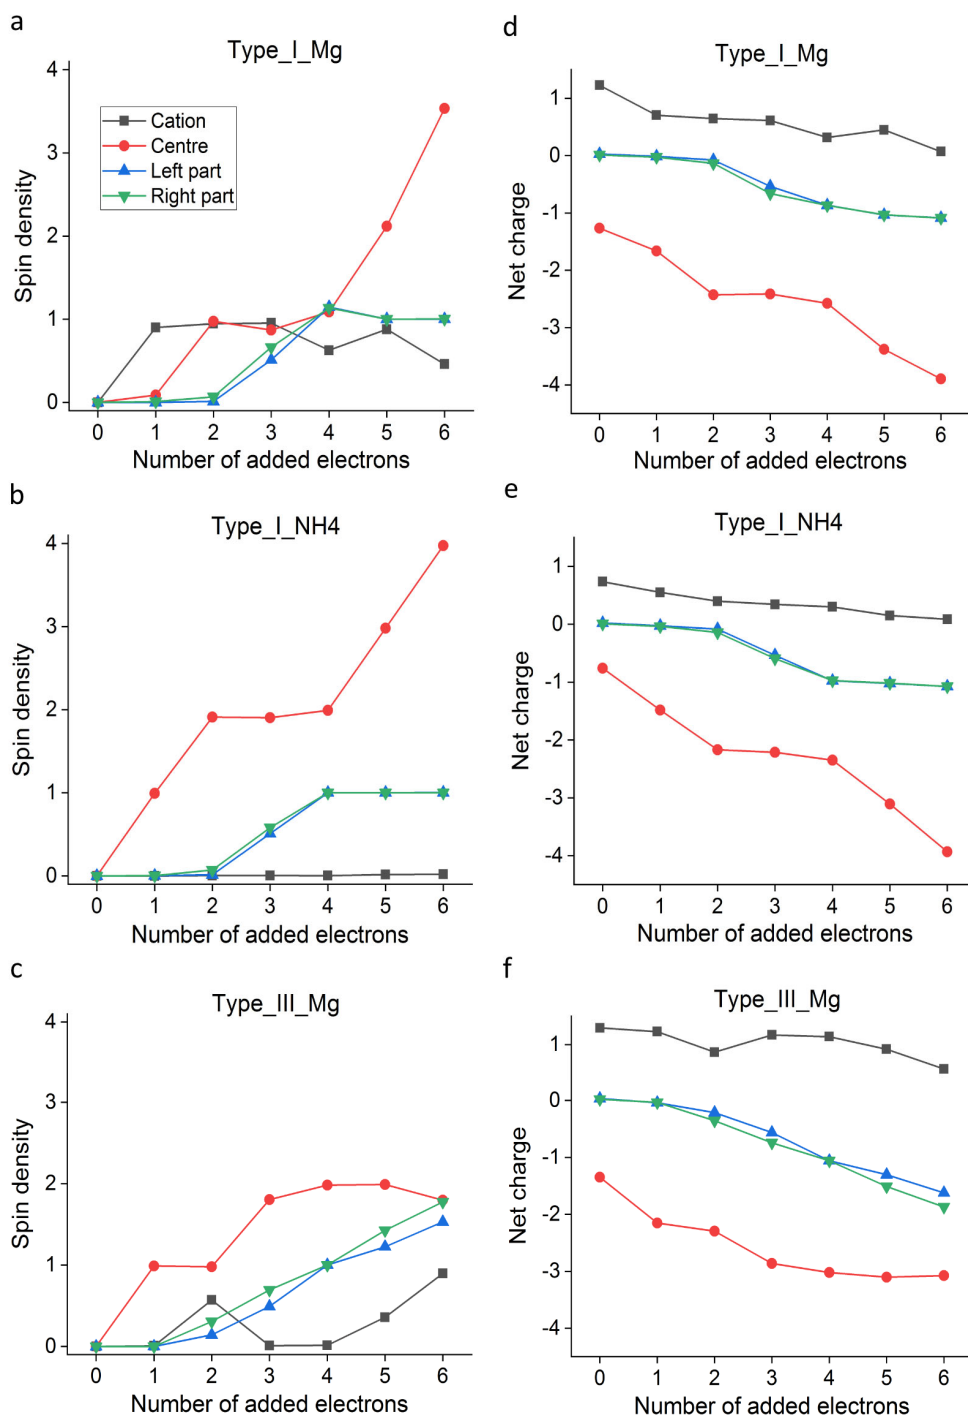

**Fig. S1** Spin density (a)-(c) and net charge (d)-(f) of the system parts during sequential addition of electrons (charging). Number of added electrons is the number of extra electrons added to the system. Each curve shows the sum of spin density or net charge (respectively) on all atoms in the corresponding part of the POV6. Color code: grey – cation (Mg or  $\text{NH}_4$ ), red – central part, blue – left-hand ligand, green – right-hand ligand.

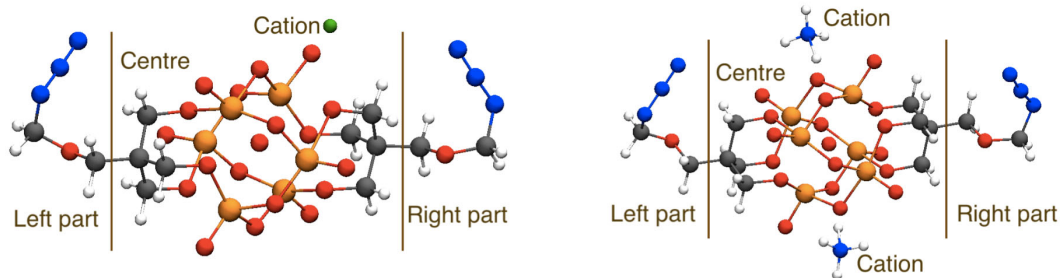

Fig. S2 System parts notation. Color code is the same as in Fig. 1, green – magnesium.

## II. Charge distribution in the POV6 in the presence of counterions

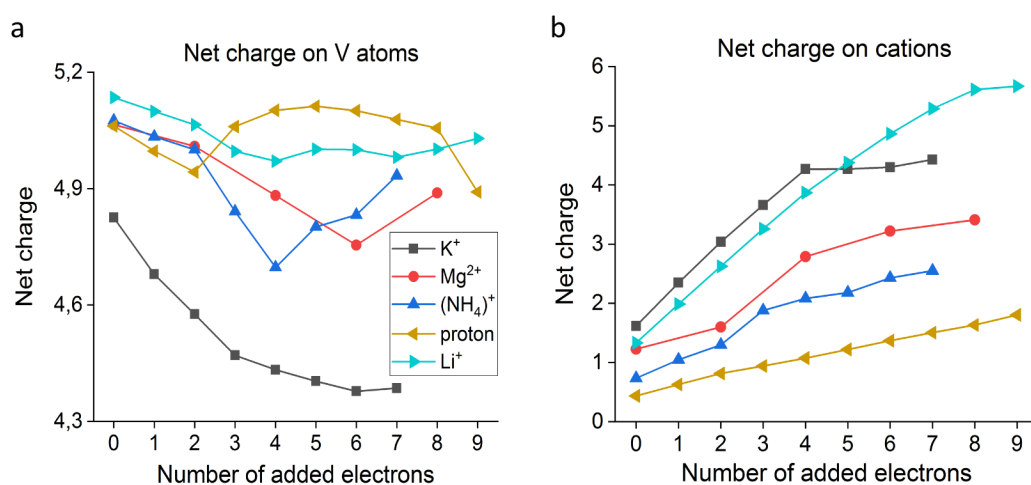

Fig. S3 Net charge during simultaneous addition of electrons and cations for different types of cations. Each curve shows the sum of net charge on all vanadium atoms (a) or all cations (b) in the system. Color code: grey – K cations, red – Mg cations, blue – NH<sub>4</sub> cations, yellow – H cations (protons), cyan – Li cations. POV6 with type I ligand is considered.

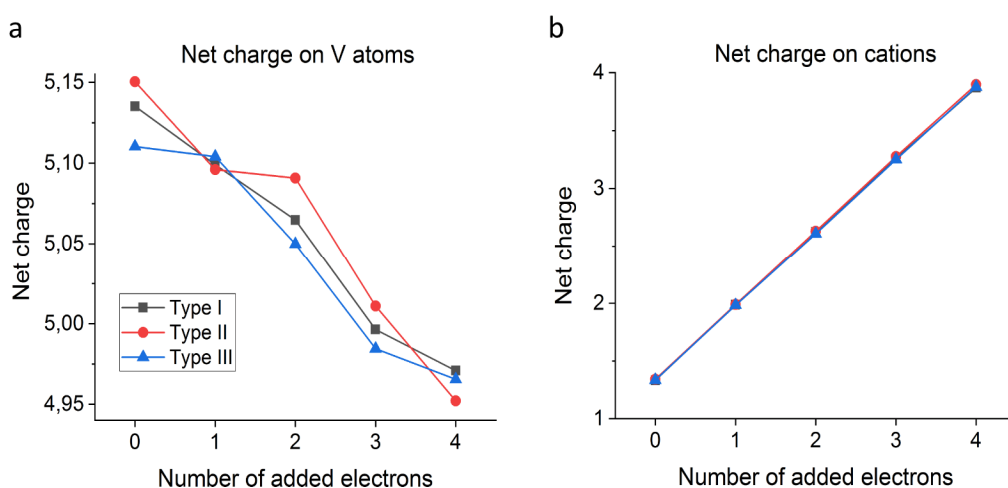

Fig. S4 Net charge during simultaneous addition of electrons and cations for different types of POV6 ligands. Each curve shows the sum of net charge on all vanadium atoms (a) or all cations (b) in the system. Color code: grey – ligand type I, red – ligand type II, blue – ligand type III. In all systems Li counterions are used.

### III. Structural integrity of the bisligated POV6 complexes in the presence of counterions

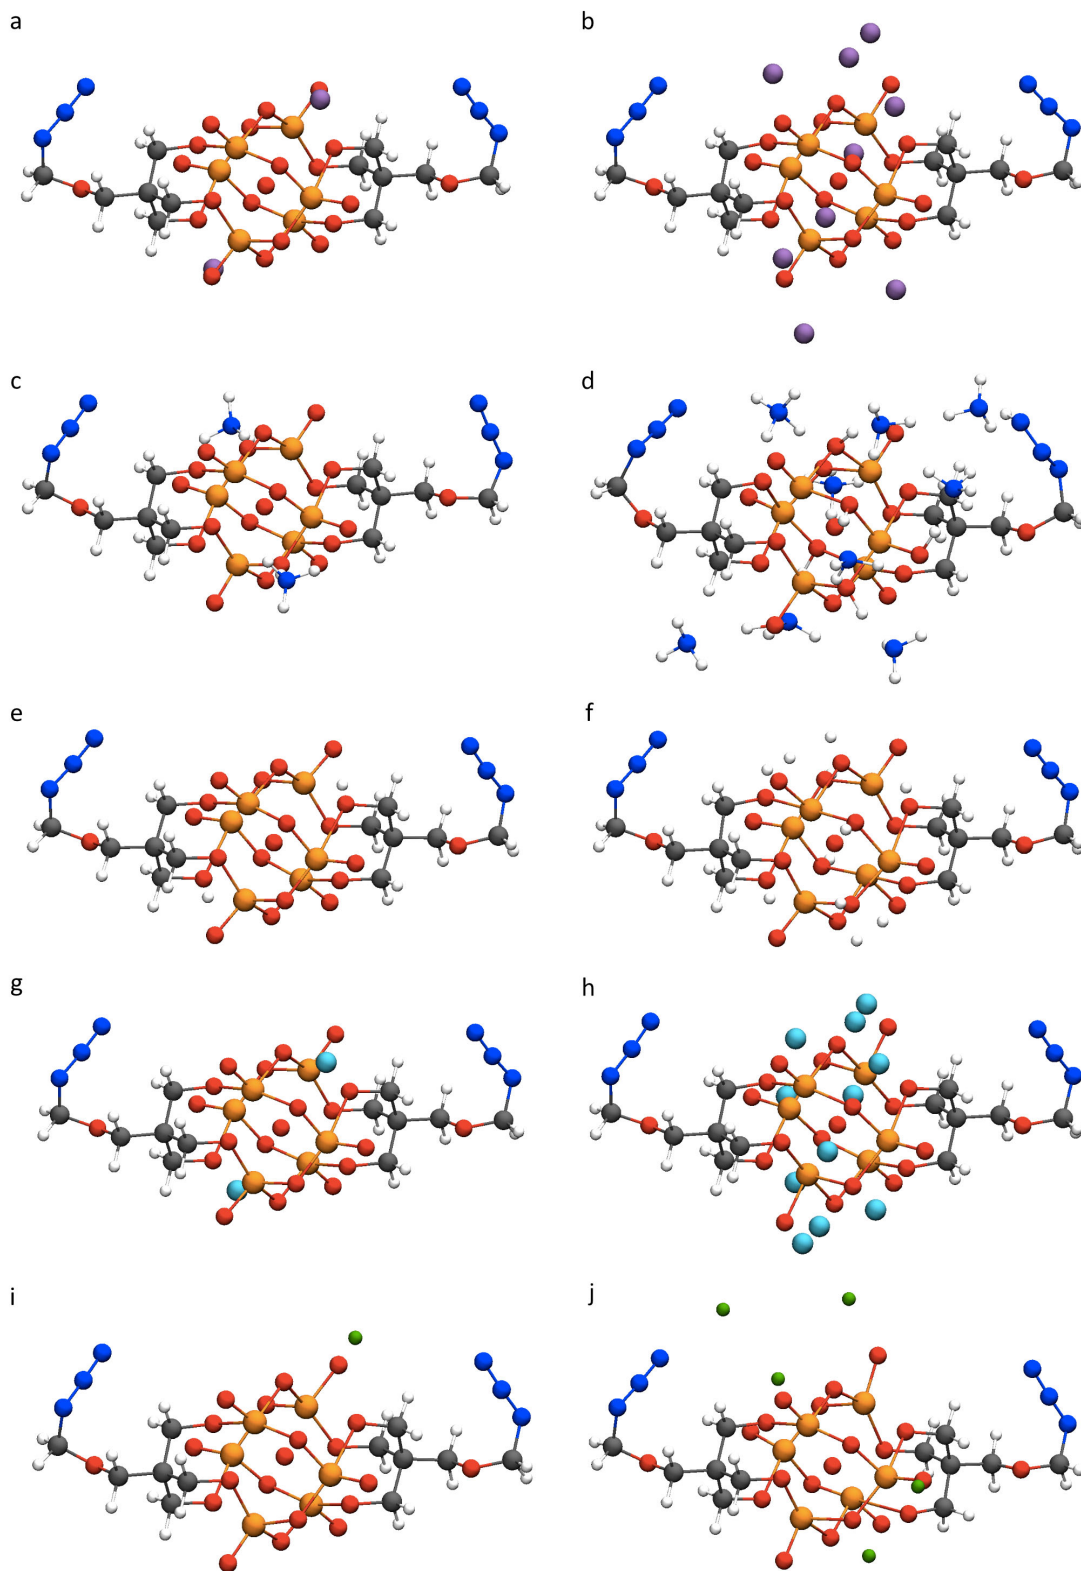

**Fig. S5** Structure of the systems with different type and number of cations. (a) 2 K cations, (b) 9 K cations, (c) 2  $\text{NH}_4$  cations, (d) 9  $\text{NH}_4$  cations, (e) 2 H cations, (f) 11 H cations, (g) 2 Li cations, (h) 11 Li cations, (i) 1 Mg cation, (j) 5 Mg cations. Colour code is the same as in Fig. 1, cyan – lithium.

#### IV. Change of V–O bond length

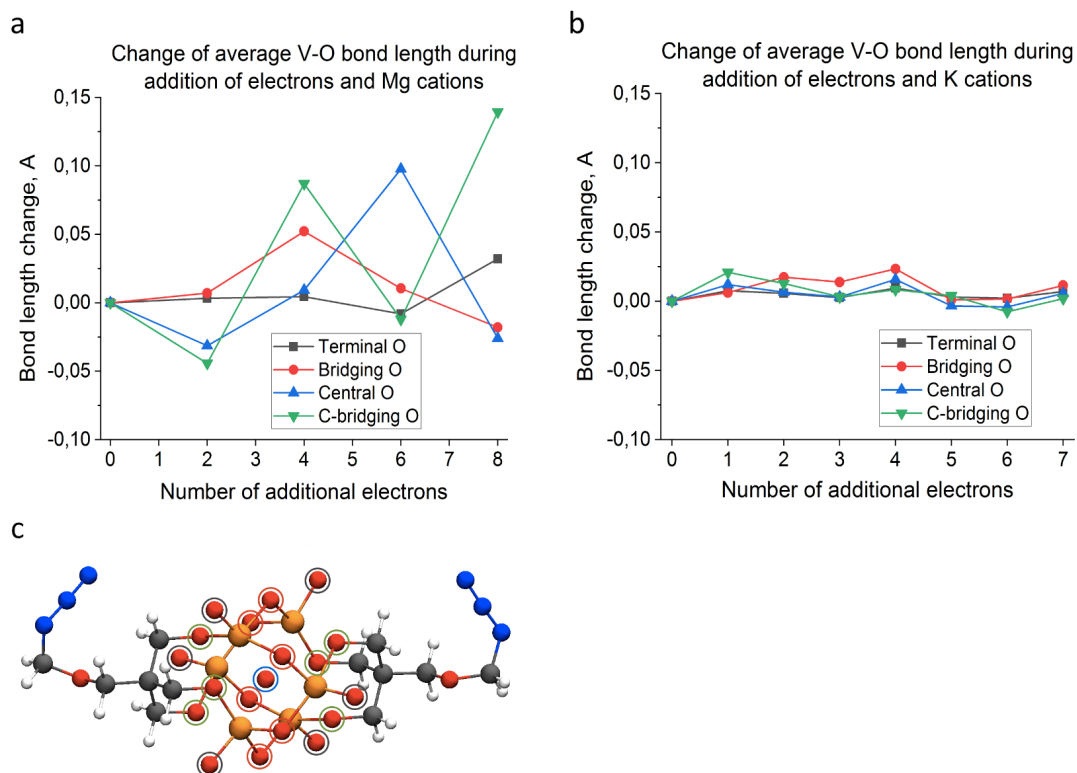

**Fig. S6** Change of V–O bond length during simultaneous addition of electrons and Mg (a) and K (b) cations. Each point shows the difference between average V–O bond length for  $n$  and  $n-1$  additional electrons for various types of O atom. (c) Notation of O atom types: grey – terminal oxygen atoms, red – bridging oxygen atoms, blue – central oxygen atoms, green – C-bridging oxygen atoms.

#### V. Energy decomposition analysis for the bisligated POV6 core with K counterions

**Table S1** Energy decomposition analysis: contribution of Pauli repulsion, electrostatic and orbital interaction to the total bonding energy.

| Additional electrons | Energy, eV           |                 |                           |                     | % of total energy |                           |                     |
|----------------------|----------------------|-----------------|---------------------------|---------------------|-------------------|---------------------------|---------------------|
|                      | Total bonding energy | Pauli repulsion | Electrostatic interaction | Orbital interaction | Pauli repulsion   | Electrostatic interaction | Orbital interaction |
| 0                    | -0.0873              | -0.0031         | -0.0009                   | -0.0834             | 3.55              | 1.03                      | 95.53               |
| 1                    | 19.3709              | 0.2035          | -0.1257                   | 19.2937             | 1.05              | 0.65                      | 99.60               |
| 2                    | 30.3819              | 0.7577          | -0.4074                   | 30.0325             | 2.49              | 1.34                      | 98.85               |
| 3                    | 44.6768              | 1.0985          | -0.6501                   | 44.2301             | 2.46              | 1.46                      | 99.00               |
| 4                    | 60.7035              | 1.7378          | -1.0242                   | 59.9923             | 2.86              | 1.69                      | 98.83               |
| 5                    | 79.8077              | 4.4241          | -2.2911                   | 77.6770             | 5.54              | 2.87                      | 97.33               |

## V. Broken symmetry state

To study the effect of different spin orientation i.e., different multiplicity, simulations of the broken symmetry states were performed. For this purpose, in systems with K as cation and 2 to 5 additional electrons (which corresponds to 4 to 7 additional K atoms) a flip of one or two spins of electrons located at V atoms was performed. The usage of this approach instead of simply specifying the lower multiplicity allows to flip the spins on different V atoms. The energy differences between high spin (all electrons on V are  $\alpha$ -electrons) and lower spin (both  $\alpha$ - and  $\beta$ -electrons are present on one or two V atoms) states for these systems are shown in Fig. S4. The exact values of total spin for each system are given in Table S2. It can be seen that spin state with the minimal energy varies for different additional electrons number. Namely, in case of 5 K cations the high spin state energy is smaller than that of low spin state, while in case of 6 and 7 cations the minimum is reached at the first lower spin states which means that these states are more stable. Besides, the absolute value of the energy difference changes with the number of cations and spin state: it is almost zero for the case of 4 cations, has similar values for the first lower symmetry states of 5, 6 and 7 cations and intermediate values for the second lower symmetry states of 6 and 7 cations.

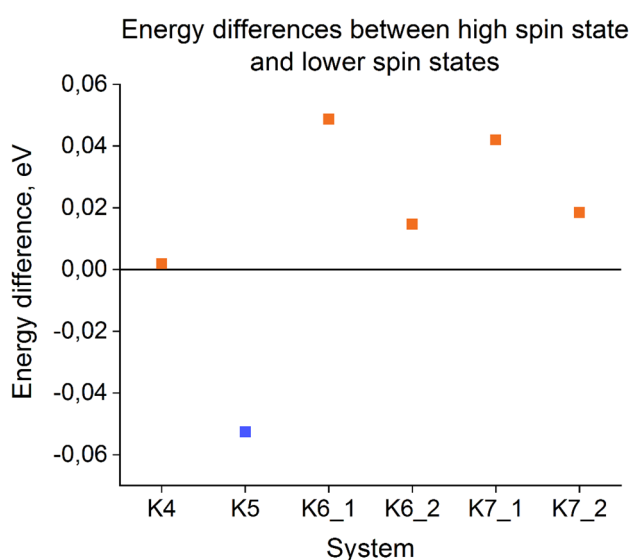

**Fig. S7** Energy differences between high spin and lower spin states for systems with various number of additional electrons and cations. First number on each tick on x axis shows a number of cations, second number (where presented) corresponds to the first or second lower symmetry state. Orange marks are the positive energy differences, blue mark is a negative energy difference.

**Table S2** Total spin of high and low spin states for systems with different number of cations.

| System | Total spin of the high spin state | Total spin of the low spin state |
|--------|-----------------------------------|----------------------------------|
| K4     | 1                                 | 0                                |
| K5     | 3/2                               | 1/2                              |
| K6_1   | 2                                 | 1                                |
| K6_2   | 2                                 | 0                                |
| K7_1   | 5/2                               | 3/2                              |
| K7_2   | 5/2                               | 1/2                              |

## VI. Spin densities at V atoms calculated with PBE and PBE0

**Table S3** Mulliken spin densities at Vanadium atoms for Type I structure with different number of cations, calculated using local DFT PBE potential and hybrid PBE0 potential.

|                | K2       | K3              | K4              | K5              | K6              |
|----------------|----------|-----------------|-----------------|-----------------|-----------------|
| PBE            |          |                 |                 |                 |                 |
| V <sub>1</sub> | 0        | 0.347928        | 0.602778        | 0.636228        | 0.917831        |
| V <sub>2</sub> | 0        | 0.22886         | 0.47481         | 0.563328        | 0.599788        |
| V <sub>3</sub> | 0        | 0.354463        | 0.134695        | 0.44195         | 0.549913        |
| V <sub>4</sub> | 0        | 0.125638        | 0.127589        | 0.671327        | 0.700797        |
| V <sub>5</sub> | 0        | 0.185671        | 0.369234        | 0.520495        | 0.730226        |
| V <sub>6</sub> | 0        | 0.113863        | 0.705154        | 0.65606         | 0.839106        |
| SUM            | <b>0</b> | <b>1.356423</b> | <b>2.41426</b>  | <b>3.489388</b> | <b>4.337661</b> |
| PBE0           |          |                 |                 |                 |                 |
| V <sub>1</sub> | 0        | 0.691183        | 1.043863        | 1.011876        | 1.098474        |
| V <sub>2</sub> | 0        | 0.101239        | 0.182144        | 0.342235        | 0.637507        |
| V <sub>3</sub> | 0        | 0.678497        | 0.095178        | 0.276394        | 0.263576        |
| V <sub>4</sub> | 0        | 0.022165        | 0.074667        | 0.988825        | 0.812331        |
| V <sub>5</sub> | 0        | 0.102419        | 0.102681        | 0.287761        | 1.017791        |
| V <sub>6</sub> | 0        | 0.024969        | 1.090014        | 0.990919        | 1.057487        |
| SUM            | <b>0</b> | <b>1.620472</b> | <b>2.588547</b> | <b>3.89801</b>  | <b>4.887166</b> |
